# Supplementary material for: Downregulating PDPK1 and taking phillyrin as PDPK1-targeting drug protect hepatocytes from alcoholic steatohepatitis by promoting autophagy
Source: PubMed Central journal article supplement (PMC9684571; doi:10.1038/s41419-022-05422-3), 2022-11-23

**FIG. 1D**

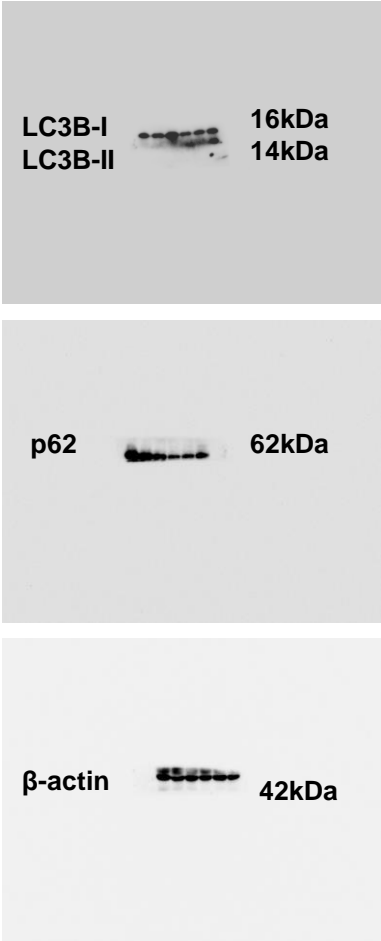

**FIG. 1I**

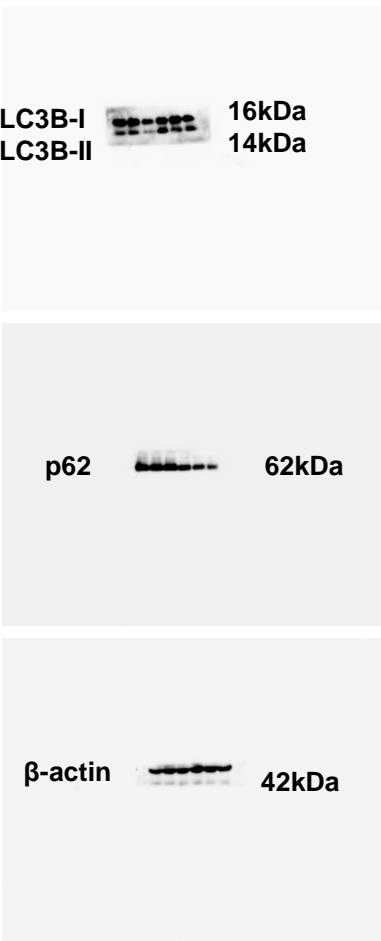

FIG. 2B

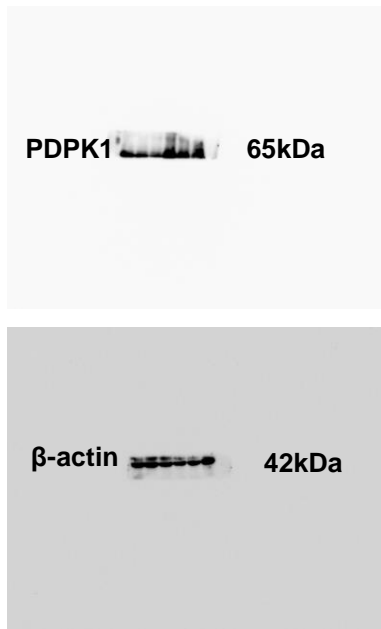

FIG. 2E

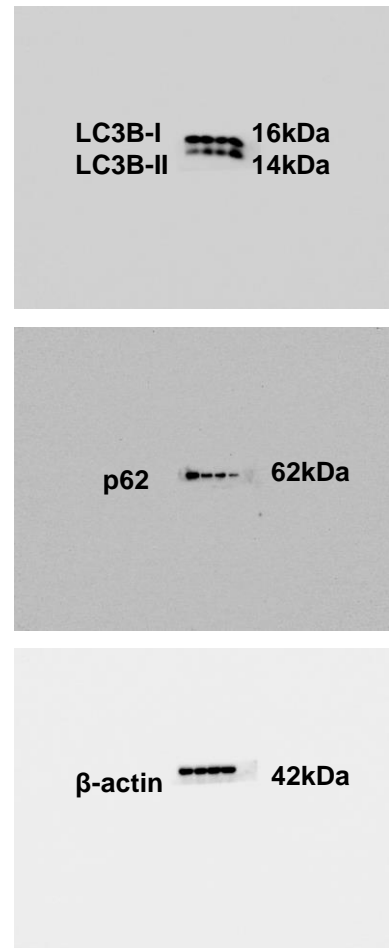

FIG. 2D

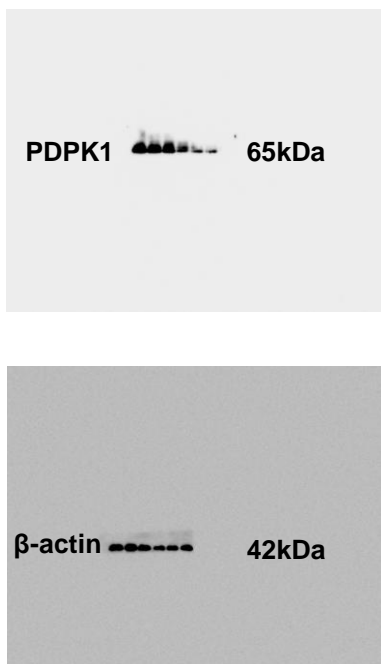

FIG. 3B

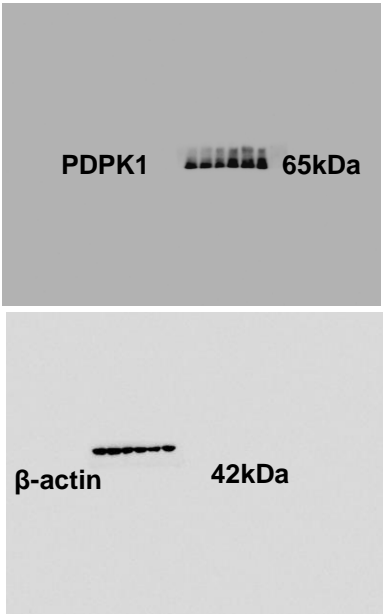

FIG. 3C

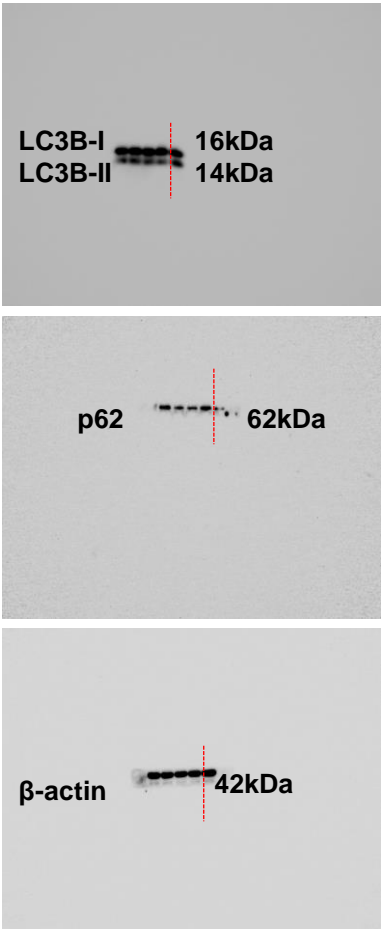

FIG. 4B

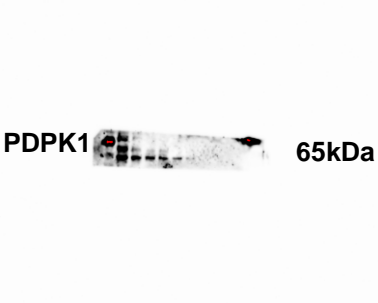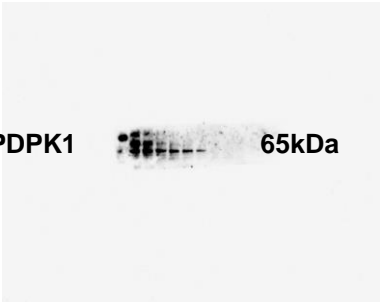

FIG. 4E

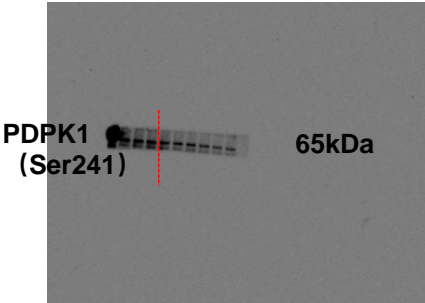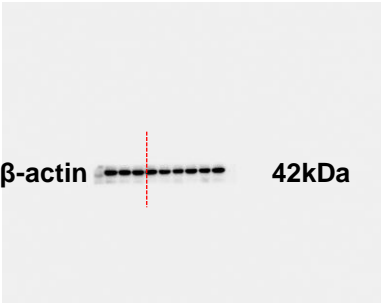

FIG. 5A

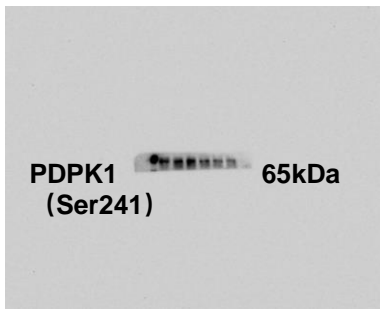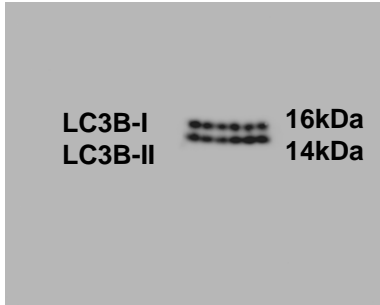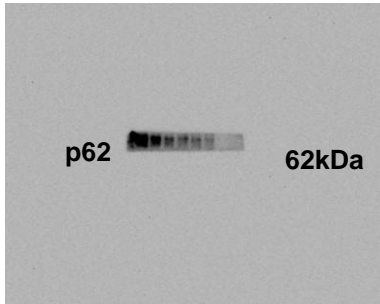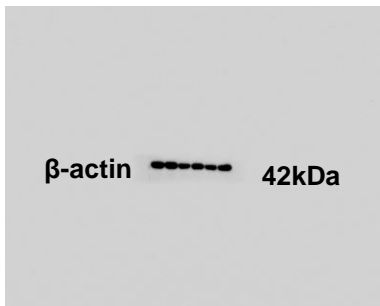

FIG. 5D

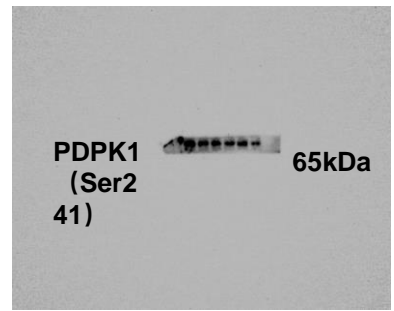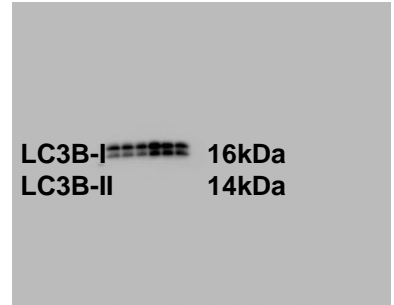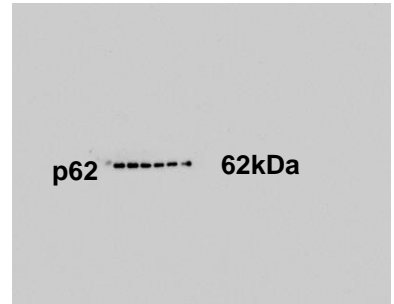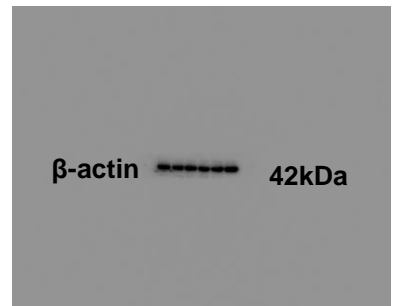

FIG. 6B

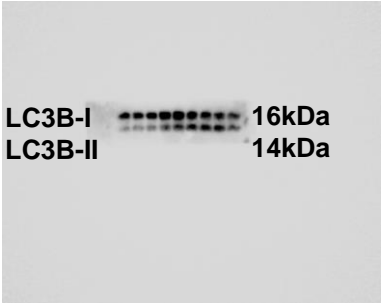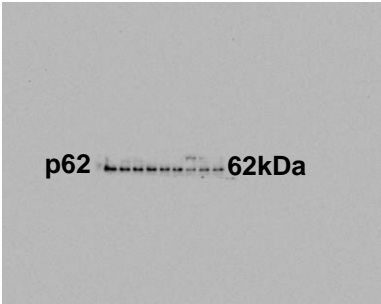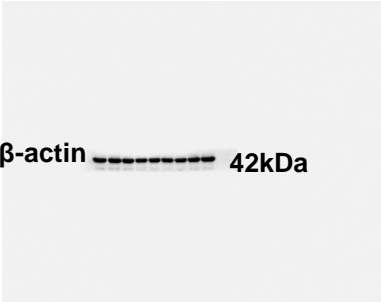

FIG. 7E

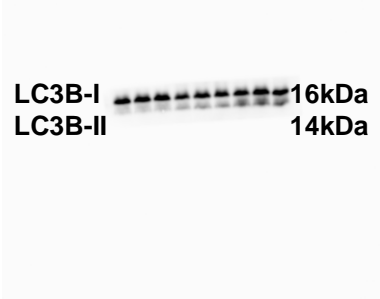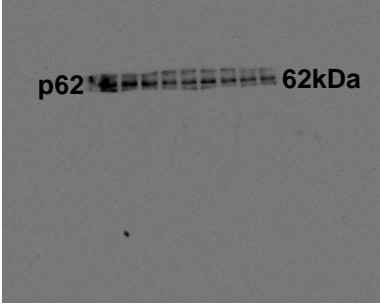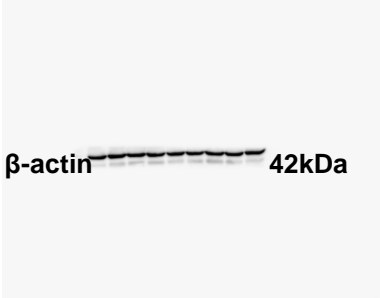

FIG. 8A

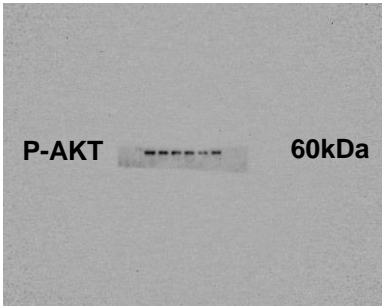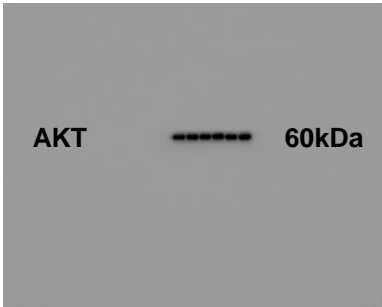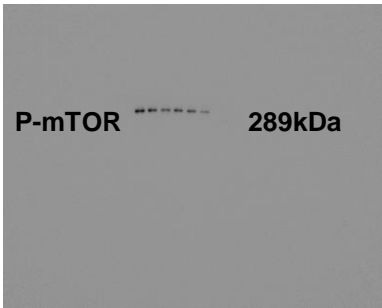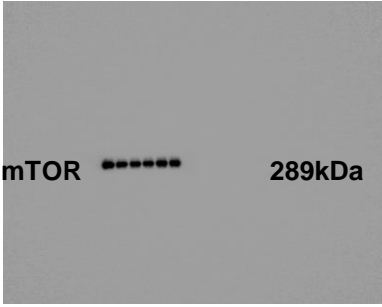

FIG. 8B

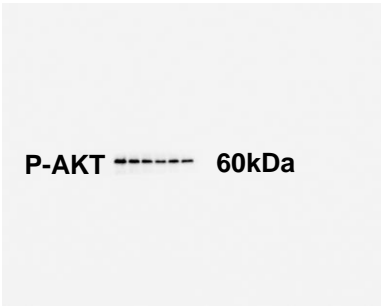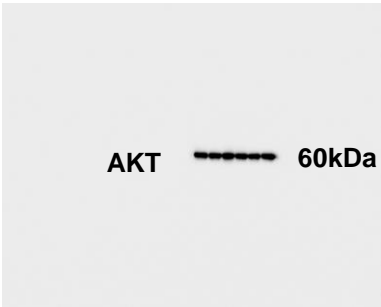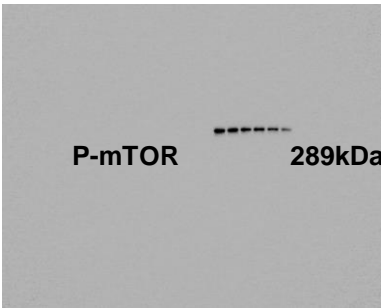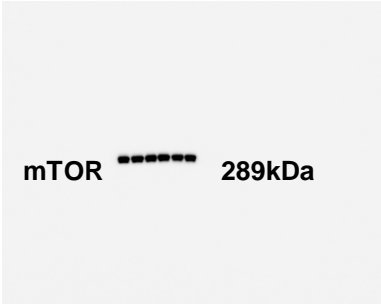



FIG. 8C

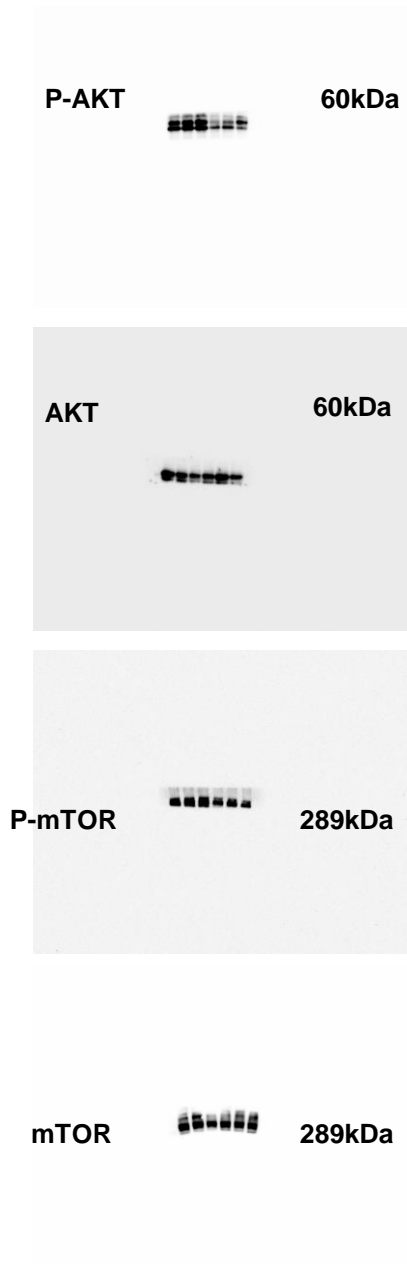

FIG. 8D

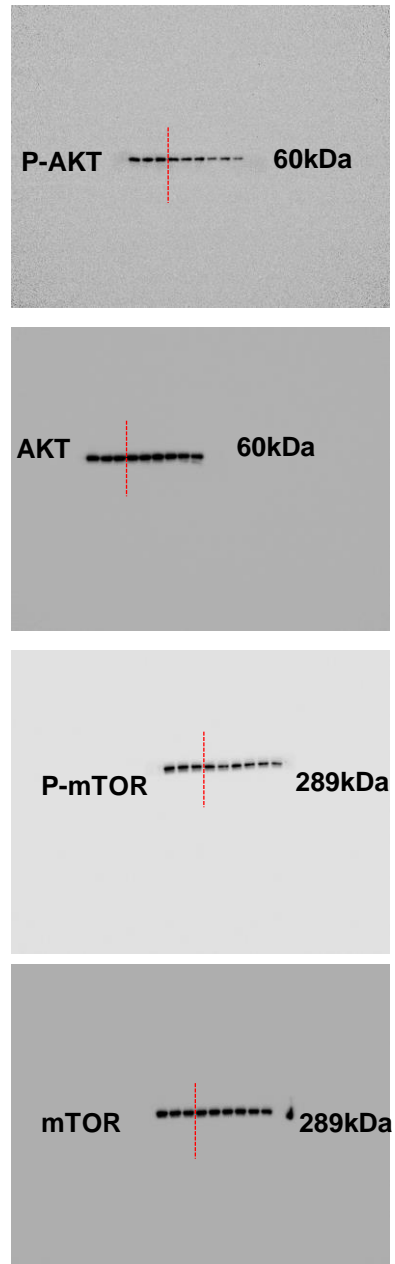

Supplementary figure 5B

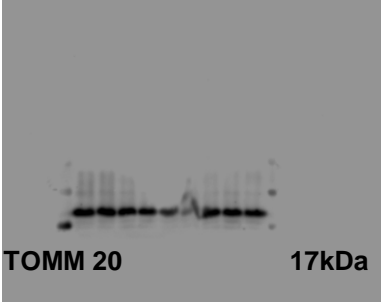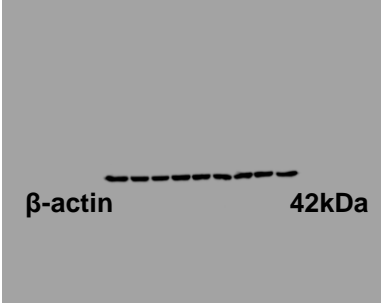

Supplementary figure 5C

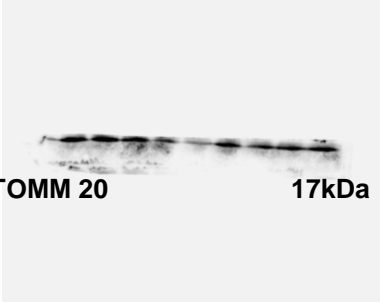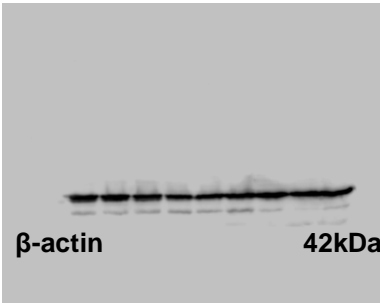

Supplement: 41419_2022_5422_MOESM8_ESM.pdf [file 41419_2022_5422_MOESM8_ESM.pdf]
